# Supplementary material
Source: Elsevier journal article supplement (https://www.sciencedirect.com/science/article/pii/S0001651917301371)
Supplement: mmc1 [file S0001651917301371:mmc1.docx]

**TABLA 4. Tumores malignos de parótida con confirmación anatomopatológica.**

| **CASOS** | **Sexo** | **PAAF** | **AP** |
| --- | --- | --- | --- |
| 1 | V | Adenocarcinoma | Adenocarcinoma |
| 2 | V | Linfoma | Linfoma |
| 3 | V | Maligno | Carcinoma escamoso |
| 4 | V | Adenocarcinoma | Adenocarcinoma |
| 5 | M | Mestastasis | Metastasis |
| 6 | M | Metastasis | Metástasis |
| 7 | V | Maligna | Ca.cel. acinares |
| 8 | V | Ca.celulas acinares | Ca. Escamoso |
| 9 | M | Ca. Cel. Acinares | Ca. Cel. Acinares |
| 10 | V | Linfoma | Linfoma |
| 11 | V | Maligna | Ca. Adenoide quístico |
| 12 | V | Maligna | Maligna |
| 13 | V | Ca. Mioepitelial | Ca. Mioepitelial |
| 14 | V | Maligna | Ca. Escamoso |
| 15 | V | Maligna | Adenocarcinoma |
| 16 | V | Ca. Cel. Acinares | Ca. Cel. Acinares |
| 17 | M | Metástasis | Metástasis |
| 18 | V | Metástasis | Metástasis |
| 19 | M | Maligna | Mucoepidermoide |
| 20 | V | Metástasis | Metástasis |
| 21 | M | Maligna | Ca. Ductal |
| 22 | M | Benigna | Linfoma |
| 23 | M | Benigna | Linfoma |
| 24 | M | Benigna | Adenocarcinoma |
| 25 | M | Whartin | Ca. Cel. Acinares |
| 26 | V | Benigna | Adenocarcinoma |
| 27 | M | Pleomorfo | Ca. Adenoide quístico |
| 28 | V | Benigna | Ca. Mucoepidermoide |
| 29 | M | Oncocitoma | Ca. Cel. Acinares |
| 30 | M | Adenopatía | Mucoepidermoide |
| 31 | M | Benigna | Mucoepidermoide |
| 32 | V | Pleomorfo | Ca. Cel. Acinares |
| 33 | V | Pleomorfo | Adenocarcinoma |
| 34 | V | No concluyente | Linfoma |
| 35 | V | No concluyente | Ca. Mioepitelial |
| 36 | V | No concluyente | Ca. Escamoso |
| 37 | V | No concluyente | Ca. Escamoso |
| 38 | V | No concluyente | Ca. Escamoso |
| 39 | V | No concluyente | Metástasis |
| 40 | M | No concluyente | Ca. Adenoide quístico |
| 41 | V | No diagnóstica | Metástasis |
| 42 | M | No diagnóstica | Mucoepidermoide |
| 43 | V | No PAAF | Carcinoma escamoso |
| 44 | V | No PAAF | Linfoma |
| 45 | V | No PAAF | Ca. Escamoso |
| 46 | M | No PAAF | Mucoepidermoide |

V: varón. M: Mujer.
