# Supplementary material
Source: Elsevier journal article supplement (https://www.sciencedirect.com/science/article/pii/S0001651917301371)
Supplement: mmc2 [file S0001651917301371:mmc2.docx]

**TABLA 5. Falsos positivos, no concluyentes y no diagnósticos de tumores de parótida benignos.**

| **CASOS** | **PAAF** | **AP** |
| --- | --- | --- |
| 1 | Maligna | Whartin |
| 2 | Maligna | whartin |
| 3 | Maligna | adenopatía |
| 4 | no concluyente | pleomorfo |
| 5 | no concluyente | pleomorfo |
| 6 | no concluyente | pleomorfo |
| 7 | no concluyente | warthin |
| 8 | no concluyente | warthin |
| 9 | no concluyente | warthin |
| 10 | no concluyente | warthin |
| 11 | no concluyente | monomorfo |
| 12 | no concluyente | oncocitoma |
| 13 | no concluyente | quiste |
| 14 | no concluyente | quiste |
| 15 | no concluyente | quiste |
| 16 | no concluyente | adenopatia |
| 17 | no concluyente | cistoadenoma |
| 18 | no concluyente | cistoadenoma |
| 19 | no concluyente | cistoadenoma |
| 20 | no concluyente | cistoadenoma |
| 21 | no diagnostica | pleomorfo |
| 22 | no diagnostica | pleomorfo |
| 23 | no diagnostica | pleomorfo |
| 24 | no diagnostica | pleomorfo |
| 25 | no diagnostica | pleomorfo |
| 26 | no diagnostica | pleomorfo |
| 27 | no diagnostica | pleomorfo |
| 28 | no diagnostica | pleomorfo |
| 29 | no diagnostica | warthin |
| 30 | no diagnostica | warthin |
| 31 | no diagnostica | warthin |
| 32 | no diagnostica | warthin |
| 33 | no diagnostica | warthin |
| 34 | no diagnostica | warthin |
| 35 | no diagnostica | warthin |
| 36 | no diagnostica | warthin |
| 37 | no diagnostica | oncocitoma |
| 38 | no diagnostica | oncocitoma |
| 39 | no diagnostica | lipoma |
| 40 | no diagnostica | lipoma |
| 41 | no diagnostica | lipoma |
| 42 | no diagnostica | lipoma |
| 43 | no diagnostica | lipoma |
| 44 | no diagnostica | quiste |
| 45 | no diagnostica | sialoadenitis |
| **46** | no diagnostica | benigna |
| **47** | no diagnostica | benigna |
